# Supplementary material for: Dual-Task Performance, Balance and Aerobic Capacity as Predictors of Falls in Older Adults with Cardiovascular Disease: A Comparative Study
Source: MDPI journal article supplement (doi:10.3390/bs13060488), 2023-06-09
Supplement: s1 [file s1]

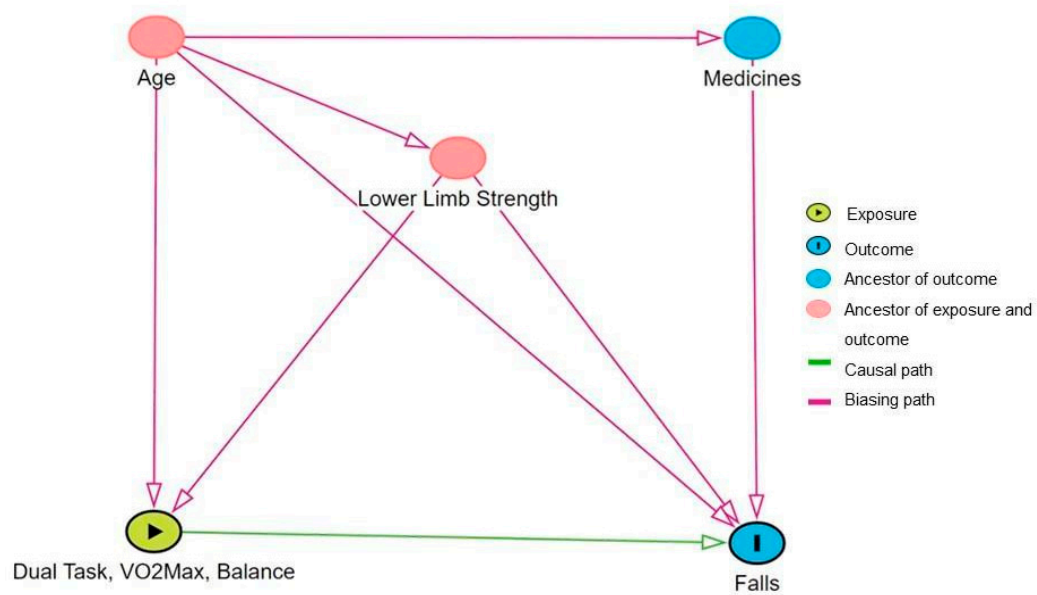

**Figure S1.** Causal diagram (DAG) constructed to guide the selection of the possible adjustment variables.
